# Supplementary material
Source: publisher figshare collection journal article supplement (https://tandf.figshare.com/articles/dataset/_/21220657)
Supplement: Supplementary file 1 [file 1]

## Sheet: Cover Sheet
	Supplementary Material 2
	Integration of Short-Lived Climate Pollutant and Air Pollutant Mitigation in Nationally Determined Contributions
	Christopher S. Malleya, Elsa N. Lefèvreb, Johan C.I. Kuylenstiernaa, Seraphine Haeusslingb, Ioli C. Howardb, Nathan Borgford-Parnellb
	aStockholm Environment Institute, Department of Environment and Geography, University of York, York, United Kingdom
	bClimate and Clean Air Coalition Secretariat, United Nations Environment Programme, Paris, France
	Description: This file contains assessment of 294 Nationally Determined Contributions (NDCs) submitted to the United Nations Framework Convention on Climate Change between 2015 and July 2022. The assessment included in this Supplemental Material was undertaken as described in the main manuscript. The columns include the following information:
	A: Country name
	B: Country ISO3 code
	C: Designation as IPCC Annex 1 or Non-Annex 1 country
	D: Year of NDC Submission
	E: Description of additional documents identified in NDC as providing information on measures to achieve NDC targets that were also reviewed in assessment of particular NDC
	G/H: Grouping of NDC within assessment undertaken, i.e. whether it was the NDC included in the pre-2020 and/or post-2020 NDC groups
	J: Date of NDC submission
	K: Weblink to NDC submission
	L: Language of NDC
	N-S: Key information on the mitigation target included within the NDC, including structure of target and its level of ambition
	U-AI: Pollutants covered within NDC
	AK-AW: Sectors covered within NDC
	AY-BB: Description from NDC of the mitigation target, as well as policies and measures, implentation mechanisms to achieve the targets, and links between the NDC and other climate change planning and reporting processes
	BD-BG: Language and framing within the NDC related to Short-Lived Climate Pollutants, air pollution and health
	BI-BM: Targets within the NDC specific to Short-Lived Climate Pollutants and air pollution
	BO-BW: Text from NDCs outlining specific mitigation measures to achieve NDC targets in key Short-Lived Climate Pollutant and air pollutant emitting sectors
	BY-EG: Inclusion of key mitigation measures within NDC (1: Included within NDC; Blank: Not included)

## Sheet: NDCs
						Analysis Groups			General Information and mitigation targets											Pollutants Covered																Source Covered
Country	ISO_A3	IPCC_annex	Year Submitted	Other Relevant Documents associated with NDC that were evaluated (specifically mentioned)		Pre-2020	Post-2020		Date of Submission	weblink	NDC Language		Unconditional Pledge	Conditional Pledge	Total Pledge	Base Year	End Year	Base Unit		CO2	CH4	N2O	HFCs	HCFC	PFCs	SF6	NF3	CF4	VOC	CO	SO2	NOx	BC	Not Specified		All Economic Sectors	Energy	Industrial Processes	Agriculture	Waste	Forests and Land Use	Transport	Electricity	Buildings	Mining/Industry	Tourism	Cooking and Lighting	Solvents
Afghanistan	AFG	Non-Annex_I	2016			1	1		2016-11-23	https://www4.unfccc.int/sites/NDCStaging/pages/Party.aspx?party=AFG	English			0.136		BAU	2030	CO2eq		1	1	1															1		1	1	1	1			1
Albania	ALB	Non-Annex_I	2016			1			2016-09-21	https://www4.unfccc.int/sites/ndcstaging/Pages/Party.aspx?party=ALB&prototype=1	English				0.115	BAU	2030	CO2eq		1																	1	1
Albania	ALB	Non-Annex_I	2021				1		2021-10-12	https://www4.unfccc.int/sites/ndcstaging/Pages/Party.aspx?party=ALB&prototype=1	English				0.209	BAU	2030	CO2eq		1	1	1	1														1	1	1	1	1
Algeria	DZA	Non-Annex_I	2016			1	1		2016-10-20	https://www4.unfccc.int/sites/NDCStaging/pages/Party.aspx?party=DZA	French		0.07	0.15	0.22	BAU	2030	CO2eq		1	1	1															1	1	1	1	1
Andorra	AND	Annex_I	2017	1st Biennial Update Report		1			2017-06-24	https://www4.unfccc.int/sites/NDCStaging/pages/Party.aspx?party=AND	French		0.37			BAU	2030	CO2eq		1	1	1				1											1			1
Andorra	AND	Annex_I	2020	1st Biennial Update Report			1		2020-05-20	https://www4.unfccc.int/sites/NDCStaging/pages/Party.aspx?party=AND	Spanish		37% Carbon neutrality			BAU	2030 2050	CO2eq		1	1	1	1		1	1											1			1	1
Angola	AGO	Non-Annex_I	2015			1			2021-11-16	https://www4.unfccc.int/sites/ndcstaging/Pages/Party.aspx?party=AGO&prototype=1	English		0.35	0.15	0.5	BAU	2030	CO2eq		1	1	1														1
Angola	AGO	Non-Annex_I	2020	None					2020-11-15	https://www4.unfccc.int/sites/ndcstaging/Pages/Party.aspx?party=AGO&prototype=1	English		0.35	0.15	0.5	BAU	2030	CO2eq		1	1	1														1
Angola	AGO	Non-Annex_I	2021				1		2021-05-31	https://www4.unfccc.int/sites/ndcstaging/Pages/Party.aspx?party=AGO&prototype=1	English		0.14	0.1	0.24	2015	2025	CO2eq		1	1	1															1	1	1	1	1
Antigua and Barbuda	ATG	Non-Annex_I	2016			1			2016-09-21	https://www4.unfccc.int/sites/ndcstaging/Pages/Party.aspx?party=ATG&prototype=1	English							Mitigation measures		1	1	1	1														1		1	1	1	1
Antigua and Barbuda	ATG	Non-Annex_I	2021				1		2021-09-02	https://www4.unfccc.int/sites/ndcstaging/Pages/Party.aspx?party=ATG&prototype=1	English							Mitigation measures		1	1	1															1		1	1	1
Argentina	ARG	Non-Annex_I	2016	2nd BUR		1			2016-11-16	https://www4.unfccc.int/sites/ndcstaging/Pages/Party.aspx?party=ARG&prototype=1	Spanish		483 million tonnes CO2e			2030 emission limit	2030	CO2e		1	1	1	1		1	1											1	1	1	1	1
Argentina	ARG	Non-Annex_I	2020				1		2020-12-29	https://www4.unfccc.int/sites/ndcstaging/Pages/Party.aspx?party=ARG&prototype=1	Spanish		359 million tonnes CO2e			2030 emission limit	2030	CO2e		1	1	1	1		1											1
Armenia	ARM	Non-Annex_I	2017			1			2017-03-23	https://www4.unfccc.int/sites/ndcstaging/Pages/Party.aspx?party=ARM&prototype=1	English		633 million tonnes - emissions quote 2015-2050					Carbon budget 2015-2050		1	1	1	1														1	1		1	1	1		1
Armenia	ARM	Non-Annex_I	2021	Fourth National Communication			1		2021-05-05	https://www4.unfccc.int/sites/ndcstaging/Pages/Party.aspx?party=ARM&prototype=1	English		0.4			1990	2030	CO2eq		1	1	1	1			1										1
Australia	AUS	Annex_I	2016			1			2016-11-09	https://www4.unfccc.int/sites/ndcstaging/Pages/Party.aspx?party=AUS&prototype=1	English		26-28%		26-28%	2005	2030	CO2eq		1	1	1	1		1	1	1									1
Australia	AUS	Annex_I	2020						2020-12-31	https://www4.unfccc.int/sites/ndcstaging/Pages/Party.aspx?party=AUS&prototype=1	English		26-28%		26-28%	2005	2030	CO2eq		1	1	1	1		1	1	1									1
Australia	AUS	Annex_I	2021	Technology Investment Roadmap Statement 2020 Australia's 2020 NDC					2021-10-28	https://www4.unfccc.int/sites/ndcstaging/Pages/Party.aspx?party=AUS&prototype=1	English		26-28% to be exceed by up to 9%			2005	2030	CO2eq		1	1	1	1		1	1	1									1
Australia	AUS	Annex_I	2022				1		2022-06-16	https://unfccc.int/sites/default/files/NDC/2022-06/Australias%20NDC%20June%202022%20Update%20%283%29.pdf	English		0.43		0.43	2005	2030	CO2eq		1	1	1	1		1	1	1									1
Azerbaijan	AZE	Non-Annex_I	2017			1	1		2017-01-09	https://www4.unfccc.int/sites/NDCStaging/pages/Party.aspx?party=AZE	English				0.35	1990	2030	CO2eq		1	1	1	1					1									1		1	1	1
Bahamas	BHS	Non-Annex_I	2016			1	1		2016-10-31	https://www4.unfccc.int/sites/NDCStaging/pages/Party.aspx?party=BHS	English				0.3	BAU	2030	CO2eq		1	1	1															1				1
Bahrain	BHR	Non-Annex_I	2016			1			2016-12-30	https://www4.unfccc.int/sites/ndcstaging/Pages/Party.aspx?party=BHR&prototype=1	English							Mitigation measures																1			1
Bahrain	BHR	Non-Annex_I	2021	National Energy EfficiencyAction Plan National Renewable Energy Action Plan			1		2021-10-18	https://www4.unfccc.int/sites/ndcstaging/Pages/Party.aspx?party=BHR&prototype=1	English							Mitigation measures																1			1
Bangladesh	BGD	Non-Annex_I	2016			1			2016-09-21	https://www4.unfccc.int/sites/ndcstaging/Pages/Party.aspx?party=BGD&prototype=1	English		0.05	0.1	0.15	BAU	2030	CO2eq		1	1	1	1		1	1											1
Bangladesh	BGD	Non-Annex_I	2021				1		2021-08-26	https://www4.unfccc.int/sites/ndcstaging/Pages/Party.aspx?party=BGD&prototype=1	English		0.0673	0.1512	0.2185	BAU	2030	CO2eq		1	1	1	1													1
Barbados	BRB	Non-Annex_I	2016			1			2016-04-22	https://www4.unfccc.int/sites/ndcstaging/Pages/Party.aspx?party=BRB&prototype=1	English				0.44	BAU	2030	CO2eq		1	1	1	1			1											1	1	1	1	1
Barbados	BRB	Non-Annex_I	2021				1		2021-07-30	https://www4.unfccc.int/sites/ndcstaging/Pages/Party.aspx?party=BRB&prototype=1	English		0.35	0.35	0.7	BAU	2030	CO2eq		1	1	1	1			1											1	1	1	1	1
Belarus	BLR	Annex_I	2016	GOVERNMENT PROGRAMmitigation measuresclimate for 2013 - 2020		1			2016-09-21	https://www4.unfccc.int/sites/ndcstaging/Pages/Party.aspx?party=BLR&prototype=1	Russian		0.28		0.28	1990	2030	CO2eq		1	1	1	1		1	1											1	1	1	1
Belarus	BLR	Annex_I	2021	Lots of other policies identified to support implementation of NDC, but not available online			1		2021-10-11	https://www4.unfccc.int/sites/ndcstaging/Pages/Party.aspx?party=BLR&prototype=1	Russian		0.35	0.05	0.4	1990	2030	CO2eq		1	1	1	1		1	1											1	1	1	1	1
Belize	BLZ	Non-Annex_I	2016			1			2016-04-20	https://www4.unfccc.int/sites/ndcstaging/Pages/Party.aspx?party=BLZ&prototype=1	English							Mitigation measures		1	1																			1	1	1	1
Belize	BLZ	Non-Annex_I	2021				1		2021-09-01	https://www4.unfccc.int/sites/ndcstaging/Pages/Party.aspx?party=BLZ&prototype=1	English							Mitigation measures		1	1																1		1	1	1
Benin	BEN	Non-Annex_I	2017			1			2017-10-11	https://www4.unfccc.int/sites/ndcstaging/Pages/Party.aspx?party=BEN&prototype=1	French							Mitigation measures		1	1	1															1		1		1
Benin	BEN	Non-Annex_I	2021				1		2021-10-12	https://www4.unfccc.int/sites/ndcstaging/Pages/Party.aspx?party=BEN&prototype=1	French				0.2015	BAU	2030	CO2eq		1	1	1	1						1	1		1	1				1	1	1	1	1
Bhutan	BTN	Non-Annex_I	2017			1			2017-09-19	https://www4.unfccc.int/sites/ndcstaging/Pages/Party.aspx?party=BTN&prototype=1	English		Carbon neutral							1	1	1															1				1
Bhutan	BTN	Non-Annex_I	2021				1		2021-06-24	https://www4.unfccc.int/sites/ndcstaging/Pages/Party.aspx?party=BTN&prototype=1	English		Carbon neutral							1	1	1								1		1					1	1	1	1	1
Bolivia	BOL	Non-Annex_I	2016			1			2016-10-05	https://www4.unfccc.int/sites/NDCStaging/pages/Party.aspx?party=BOL	Spanish				Mitigation Actions	2010	2030	Mitigation Actions																			1		1		1
Bolivia	BOL	Non-Annex_I	2022				1		2022-04-15	https://unfccc.int/sites/default/files/NDC/2022-06/CND%20Bolivia%202021-2030.pdf	Spanish				Mitigation: The Plurinational State of Bolivia, until 2030, plans to make efforts in terms of transitioning the national electricity generation matrix towards a system strongly based on renewable energies; improving energy efficiency and comprehensive and sustainable forest management that contribute to the reduction of GHG emissions.			Mitigation measures		1	1	1	1														1	1	1	1	1
Bosnia and Herzegovina	BIH	Non-Annex_I	2017			1			2017-03-16	https://www4.unfccc.int/sites/ndcstaging/Pages/Party.aspx?party=BIH&prototype=1	English		0.02	0.21	0.23	BAU	2030	CO2eq		1	1	1														1
Bosnia and Herzegovina	BIH	Non-Annex_I	2021				1		2021-04-20	https://www4.unfccc.int/sites/ndcstaging/Pages/Party.aspx?party=BIH&prototype=1	English		0.128	0.047	0.178	2014	2030	CO2eq		1	1	1	1														1	1	1	1	1	1	1	1	1
Botswana	BWA	Non-Annex_I	2016			1	1		2016-11-11	https://www4.unfccc.int/sites/NDCStaging/pages/Party.aspx?party=BWA	English				0.15	2010	2030	CO2eq		1	1	1															1		1	1
Brazil	BRA	Non-Annex_I	2016	National Policy on Climate Change (Law 12,187/2009) the Law on the Protection of Native Forests (Law 12,651/2012, hereinafter referred as Forest Code) the Law on the National System of Conservation Units (Law 9,985/2000)		1			2016-09-20	https://www4.unfccc.int/sites/ndcstaging/Pages/Party.aspx?party=BRA&prototype=1	English		0.37			2005	2025	CO2eq		1	1	1	1		1	1										1
Brazil	BRA	Non-Annex_I	2020						2020-12-08	https://www4.unfccc.int/sites/ndcstaging/Pages/Party.aspx?party=BRA&prototype=1	English		37% 2025 43% 2030			2005	2025 2030	CO2eq		1	1	1	1		1	1										1
Brazil	BRA	Non-Annex_I	2022				1		2022-04-07	https://www4.unfccc.int/sites/ndcstaging/Pages/Party.aspx?party=BRA&prototype=1	English		37% 2025 50% 2030			2005	2030	CO2eq		1	1	1	1		1	1										1
Brunei	BRN	Non-Annex_I	2020				1		2020-12-31	https://www4.unfccc.int/sites/ndcstaging/Pages/Party.aspx?party=BRN&prototype=1	English		0.2		0.2	BAU	2030	CO2e		1	1	1														1	1	1	1	1	1
Burkina Faso	BFA	Non-Annex_I	2016			1			2016-11-11	https://www4.unfccc.int/sites/ndcstaging/Pages/Party.aspx?party=BFA&prototype=1	French		0.066	0.116	0.182	BAU	2030	CO2eq		1	1	1								1		1				1
Burkina Faso	BFA	Non-Annex_I	2021				1		2021-10-09	https://www4.unfccc.int/sites/ndcstaging/Pages/Party.aspx?party=BFA&prototype=1	French		0.196	0.0982	0.2942	BAU	2030	CO2eq		1	1	1	1														1	1	1	1	1
Burundi	BDI	Non-Annex_I	2018			1			2018-01-17	https://www4.unfccc.int/sites/ndcstaging/Pages/Party.aspx?party=BDI&prototype=1	French		0.03	0.2	0.23	BAU	2030	CO2eq		1	1	1															1	1	1	1	1
Burundi	BDI	Non-Annex_I	2021				1		2021-10-05	https://www4.unfccc.int/sites/ndcstaging/Pages/Party.aspx?party=BDI&prototype=1	French		0.0304	0.1261	0.1565	BAU	2030	CO2eq		1	1	1															1	1	1	1	1
Cabo Verde	CPV	Non-Annex_I	2017			1			2017-09-21	https://www4.unfccc.int/sites/ndcstaging/Pages/Party.aspx?party=CPV&prototype=1	English			Sectoral targets		BAU	2030	Mitigation measures		1	1	1															1		1	1	1	1
Cabo Verde	CPV	Non-Annex_I	2021				1		2021-04-02	https://www4.unfccc.int/sites/ndcstaging/Pages/Party.aspx?party=CPV&prototype=1	English		0.18	0.06	0.24	BAU	2030	CO2eq		1	1	1	1														1	1	1	1	1
Cambodia	KHM	Non-Annex_I	2017			1			2017-02-06	https://www4.unfccc.int/sites/ndcstaging/Pages/Party.aspx?party=KHM&prototype=1	English			3100 Gg CO2eq reduction from energy Increase forst C sequstration from 7897 Gg CO2e in 2030 BAU to 18492 GgCO2e	3100 Gg CO2eq reduction from energy Increase forst C sequstration from 7897 Gg CO2e in 2030 BAU to 18492 GgCO2e	BAU	2030	CO2eq		1	1	1															1			1	1	1		1	1
Cambodia	KHM	Non-Annex_I	2020				1		2020-12-31	https://www4.unfccc.int/sites/ndcstaging/Pages/Party.aspx?party=KHM&prototype=1	English				0.417	BAU	2030	CO2eq		1	1	1															1	1	1	1	1
Cameroon	CMR	Non-Annex_I	2016			1			2016-07-29	https://www4.unfccc.int/sites/ndcstaging/Pages/Party.aspx?party=CMR&prototype=1	French			0.32	0.32	BAU	2035	CO2eq		1	1	1															1		1	1	1
Cameroon	CMR	Non-Annex_I	2021				1		2021-10-11	https://www4.unfccc.int/sites/ndcstaging/Pages/Party.aspx?party=CMR&prototype=1	French		0.12	0.23	0.35	BAU	2030	CO2eq		1	1	1														1
Canada	CAN	Annex_I	2016						2016-10-05	https://www4.unfccc.int/sites/ndcstaging/Pages/Party.aspx?party=CAN&prototype=1	English/French		0.3			2005	2030	CO2eq		1	1	1	1		1	1	1									1
Canada	CAN	Annex_I	2017			1			2017-05-11	https://www4.unfccc.int/sites/ndcstaging/Pages/Party.aspx?party=CAN&prototype=1	English/French		0.3			2005	2030	CO2eq		1	1	1	1		1	1	1									1
Canada	CAN	Annex_I	2021				1		2021-07-12	https://www4.unfccc.int/sites/ndcstaging/Pages/Party.aspx?party=CAN&prototype=1	English/French		40-45%			2005	2030	CO2eq		1	1	1	1		1	1	1										1	1	1	1	1
Central African Republic	CAF	Non-Annex_I	2016			1			2016-10-11	https://www4.unfccc.int/sites/NDCStaging/pages/Party.aspx?party=CAF	French			5% 25%	5% 25%	BAU	2030 2050	CO2eq		1	1	1															1	1	1	1	1
Central African Republic	CAF	Non-Annex_I	2022				1		2022-01-24	https://www4.unfccc.int/sites/NDCStaging/pages/Party.aspx?party=CAF	French		9.03% 11.82%	14.64% 24.28%	14.64% 24.28%	BAU	2025 2030	CO2eq		1	1	1	1						1	1	1	1	1				1	1	1	1	1
Chad	TCD	Non-Annex_I	2017			1			2017-01-12	https://www4.unfccc.int/sites/ndcstaging/Pages/Party.aspx?party=TCD&prototype=1	French		0.182	0.528	0.71	BAU	2030	CO2eq		1	1	1															1		1	1	1
Chad	TCD	Non-Annex_I	2021				1		2021-10-19	https://www4.unfccc.int/sites/ndcstaging/Pages/Party.aspx?party=TCD&prototype=1	French		0.005	0.187	0.193	BAU	2030	CO2eq		1	1	1															1		1	1	1
Chile	CHL	Non-Annex_I	2017			1			2017-02-09	https://www4.unfccc.int/sites/ndcstaging/PublishedDocuments/Chile%20First/Chile%20INDC%20FINAL.pdf	Spanish/English		0.3	35-45%	45% + Chile has committed to the sustainable development and recovery of 100,000 hectares of forest land, mainly native, which will account for greenhouse gas sequestrations and reductions of an annual equivalent of around 600,000 of CO2 as of 2030. This commitment is subject to the approval of the Native Forest Recovery and Forestry Promotion Law.	2007	2030	tonnes CO2 eq per million CLP$2011 GDP		1	1	1	1		1												1	1	1	1
Chile	CHL	Non-Annex_I	2020	Framework Law on Climate Change			1		2020-04-08	https://www4.unfccc.int/sites/ndcstaging/PublishedDocuments/Chile%20First/Chile's_NDC_2020_english.pdf	Spanish/English		1100 t CO2eq budget 95 Mt CO2eq 2030				2030	2020-2030 CO2eq budget 2030 CO2eq emissions		1	1	1	1		1	1	1									1	1	1	1	1	1
China	CHN	Non-Annex_I	2016			1			2016-09-03	https://www4.unfccc.int/sites/ndcstaging/Pages/Party.aspx?party=CHN&prototype=1	Chinese		To achieve the peaking of carbon dioxide emissions around 2030 and making best efforts to peak early; • To lower carbon dioxide emissions per unit of GDP by 60% to 65% from the 2005 level; • To increase the share of non-fossil fuels in primary energy consumption to around 20%; and • To increase the forest stock volume by around 4.5 billion cubic meters on the 2005 level		To achieve the peaking of carbon dioxide emissions around 2030 and making best efforts to peak early; • To lower carbon dioxide emissions per unit of GDP by 60% to 65% from the 2005 level; • To increase the share of non-fossil fuels in primary energy consumption to around 20%; and • To increase the forest stock volume by around 4.5 billion cubic meters on the 2005 level	2005	2030	Mitigation actions: Carbon intensity target		1	1	1	1	1													1	1	1	1	1
China	CHN	Non-Annex_I	2021				1		2021-10-28	https://www4.unfccc.int/sites/ndcstaging/Pages/Party.aspx?party=CHN&prototype=1	Chinese		China’s updated NDC goals are as follows: aims to have CO2 emissions peak before 2030 and achieve carbon neutrality before 2060; to lower CO2 emissions per unit of GDP by over 65% from the 2005 level, to increase the share of non-fossil fuels in primary energy consumption to around 25%, to increase the forest stock volume by 6 billion cubic meters from the 2005 level, and to bring its total insta…		China’s updated NDC goals are as follows: aims to have CO2 emissions peak before 2030 and achieve carbon neutrality before 2060; to lower CO2 emissions per unit of GDP by over 65% from the 2005 level, to increase the share of non-fossil fuels in primary energy consumption to around 25%, to increase the forest stock volume by 6 billion cubic meters from the 2005 level, and to bring its total insta…	2005	2030	Mitigation actions: Carbon intensity target		1	1	1	1			1											1	1	1	1	1
Colombia	COL	Non-Annex_I	2018	Planes de Acción Sectorial de Mitigación para el Cambio Climático (PAS)		1			2018-07-12	https://www4.unfccc.int/sites/ndcstaging/Pages/Party.aspx?party=COL&prototype=1	Spanish		0.2	0.1	0.3	BAU	2030	CO2e		1	1	1	1		1	1										1
Colombia	COL	Non-Annex_I	2020				1		2020-12-30	https://www4.unfccc.int/sites/ndcstaging/Pages/Party.aspx?party=COL&prototype=1	Spanish		0.51		0.51	BAU	2030	CO2e		1	1	1	1		1	1										1
Comoros	COM	Non-Annex_I	2016			1			2016-11-23	https://www4.unfccc.int/sites/NDCStaging/pages/Party.aspx?party=COM	French		0.084	0.756	0.84	BAU	2030	CO2eq		1	1	1															1		1	1	1
Comoros	COM	Non-Annex_I	2021				1		2021-11-05	https://www4.unfccc.int/sites/NDCStaging/pages/Party.aspx?party=COM	French		5% of targets	95% of targets	23% reduction in GHG emissions exccluding LULUCF 47% increase in CO2 absorption in LULUCF	BAU	2030	CO2eq		1	1	1	1														1	1	1	1	1
Congo	COG	Non-Annex_I	2017			1			2017-04-21	https://www4.unfccc.int/sites/ndcstaging/Pages/Party.aspx?party=COG&prototype=1	French			0.48	0.48	BAU	2025	CO2eq		1	1	1															1	1	1	1	1
Congo	COG	Non-Annex_I	2021				1		2021-08-02	https://www4.unfccc.int/sites/ndcstaging/Pages/Party.aspx?party=COG&prototype=1	French		17.09% 21.46%	22.79% 10.73%	39.88% 32.19%	BAU	2025 2030	CO2eq		1	1	1	1		1	1											1	1	1	1	1
Cook Islands	COK	Non-Annex_I	2016			1	1		2016-09-01	https://www4.unfccc.int/sites/NDCStaging/Pages/All.aspx	English		0.38	0.43	0.81	2006	2030	CO2		1																	1
Costa Rica	CRI	Non-Annex_I	2016	National Low Carbon Livestock Strategy		1			2016-10-12	https://www4.unfccc.int/sites/ndcstaging/Pages/Party.aspx?party=CRI&prototype=1	Spanish		0.25			2012	2030	CO2eq		1	1	1	1		1	1										1
Costa Rica	CRI	Non-Annex_I	2020	2050 Decarbonisation plan			1		2020-12-28	https://www4.unfccc.int/sites/ndcstaging/Pages/Party.aspx?party=CRI&prototype=1	Spanish		maximum absolute emissions in 2030 9.11 million tonnes CO2e maximum 2021-2030 emissions 106.53 million tonnes CO2e				2030	CO2eq Maximum emissions scenarios, also 2021-2030 cumulative emissions		1	1	1	1	1	1	1			1	1	1	1				1
Cote d'Ivoire	CIV	Non-Annex_I	2016			1			2016-10-25	https://www4.unfccc.int/sites/NDCStaging/pages/Party.aspx?party=CIV	French				0.2825	BAU	2030	CO2eq		1	1	1															1		1	1	1
Cote d'Ivoire	CIV	Non-Annex_I	2022				1				French		0.3041	0.6854	0.9895	BAU	2030	CO2eq		1	1	1	1						1	1	1	1	1				1	1	1	1	1
Cuba	CUB	Non-Annex_I	2016			1			2016-12-29	https://www4.unfccc.int/sites/ndcstaging/Pages/Party.aspx?party=CUB&prototype=1	Spanish		N.A.					No target made		1	1	1															1		1
Cuba	CUB	Non-Annex_I	2020				1		2020-09-16	https://www4.unfccc.int/sites/ndcstaging/Pages/Party.aspx?party=CUB&prototype=1	Spanish		N.A.					Actions and policies		1	1	1															1		1		1
Democratic Republic of Congo	COD	Non-Annex_I	2017			1			2017-12-13	https://www4.unfccc.int/sites/NDCStaging/pages/Party.aspx?party=COD	French			0.17		BAU	2030	CO2eq		1	1	1															1		1		1
Democratic Republic of Congo	COD	Non-Annex_I	2021				1		2021-12-28	https://www4.unfccc.int/sites/NDCStaging/pages/Party.aspx?party=COD	French		0.02	0.19	0.21	BAU	2030	CO2eq		1	1	1															1		1	1	1
Djibouti	DJI	Non-Annex_I	2016			1	1		2016-11-11	https://www4.unfccc.int/sites/NDCStaging/pages/Party.aspx?party=DJI	French		0.4	0.2	0.6	BAU	2030	CO2eq		1	1	1															1	1	1	1
Dominica	DMA	Non-Annex_I	2016			1			2016-09-21	https://www4.unfccc.int/sites/NDCStaging/pages/Party.aspx?party=DMA	English			0.447	0.447	2014	2030	CO2eq		1	1	1	1														1	1	1	1	1	1		1	1
Dominica	DMA	Non-Annex_I	2022				1		2022-07-04	https://unfccc.int/sites/default/files/2022-07/The%20Commonwealth%20of%20Dominica%20updated%20NDC%20July%204%20%2C.pdf	English			0.45		2014	2030	CO2eq		1	1	1	1						1		1						1	1	1	1
Dominican Republic	DOM	Non-Annex_I	2020				1		2020-12-28	https://www4.unfccc.int/sites/ndcstaging/Pages/Party.aspx?party=DOM&prototype=1	Spanish			0.07	20% overall 27%	BAU	2030	CO2e		1	1	1	1		1	1	1										1	1	1	1	1
Dominican Republic	DOM	Non-Annex_I	2017	Climate Comapatible Development Plan (CCDP)		1			2017-09-20	https://www4.unfccc.int/sites/ndcstaging/Pages/Party.aspx?party=DOM&prototype=1	Spanish			0.25		2010	2030	co2e		1	1	1															1	1	1	1	1
Ecuador	ECU	Non-Annex_I	2019			1	1		2019-03-29	https://www4.unfccc.int/sites/NDCStaging/pages/Party.aspx?party=ECU	Spanish		9% - all sectors except LULUCF 4% - LULUCF	11.9% - all sectors except LULUCF 16% - LULUCF	20.9% - all sectors except LULUCF 20% - LULUCF	BAU	2025	CO2eq		1	1	1															1	1	1	1	1
Egypt	EGY	Non-Annex_I	2017			1			2017-06-29	https://www4.unfccc.int/sites/NDCStaging/pages/Party.aspx?party=EGY	English				Mitigation Actions			Mitigation measures																		1
Egypt	EGY	Non-Annex_I	2022				1		2022-07-07	https://unfccc.int/sites/default/files/NDC/2022-07/Egypt%20Updated%20NDC.pdf.pdf	English			33% - Electricity 65% - Oil and Gas 7% - Transport	33% - Electricity 65% - Oil and Gas 7% - Transport	BAU	2030	CO2eq		1	1	1																				1	1
El Salvador	SLV	Non-Annex_I	2017			1			2017-10-30	https://www4.unfccc.int/sites/NDCStaging/pages/Party.aspx?party=SLV	Spanish			Miigation measures		Mitigation measures																		1			1		1	1	1
El Salvador	SLV	Non-Annex_I	2022				1		2022-01-04	https://www4.unfccc.int/sites/NDCStaging/pages/Party.aspx?party=SLV	Spanish		640 ktonne reduction from fuel burning activities	179 ktonne reduction from fuel burning activities 50857.5 kton reduction from carbon sinks and reservoirs in agricultural landscapes in AFOLU sector	819 ktonne reduction from fuel burning activities 50857.5 kton reduction from carbon sinks and reservoirs in agricultural landscapes in AFOLU sector	BAU	2030 - fuel combustion 2035-2040 - GHG sinks	CO2eq		1																	1		1		1
Equitorial Guinea	GNQ	Non-Annex_I	2018			1	1		2018-10-30	https://www4.unfccc.int/sites/NDCStaging/pages/Party.aspx?party=GNQ	Spanish			20% 50%	20% 50%	2010	2030 2050	CO2eq		1	1	1															1		1	1	1	1
Eritrea	ERI	Non-Annex_I	2018			1	1		2018-06-19	https://www4.unfccc.int/sites/NDCStaging/pages/Party.aspx?party=ERI	English		0.12	0.265	0.385	BAU	2030	CO2eq		1	1	1															1	1	1	1	1
Eswatini	SWZ	Non-Annex_I	2016			1			2016-09-21	https://www4.unfccc.int/sites/ndcstaging/Pages/Party.aspx?party=SWZ&prototype=1	English							Mitigation measures		1	1	1	1		1	1											1	1
Eswatini	SWZ	Non-Annex_I	2021				1		2021-10-12	https://www4.unfccc.int/sites/ndcstaging/Pages/Party.aspx?party=SWZ&prototype=1	English		0.05	0.09	0.14	BAU	2030	CO2eq		1	1		1														1	1	1	1	1
Ethiopia	ETH	Non-Annex_I	2017	Climate Resilient Green Economy		1			2017-03-09	https://www4.unfccc.int/sites/ndcstaging/Pages/Party.aspx?party=ETH&prototype=1	English			0.64	0.64	BAU	2030	CO2eq		1	1	1																	1		1	1	1	1	1
Ethiopia	ETH	Non-Annex_I	2021				1		2021-07-23	https://www4.unfccc.int/sites/ndcstaging/Pages/Party.aspx?party=ETH&prototype=1	English		0.14	0.548	0.648	BAU	2030	CO2eq		1	1	1															1		1	1	1				1
European Union	EU27	Annex_I	2016			1			2016-11-17	https://www4.unfccc.int/sites/ndcstaging/Pages/Party.aspx?party=DEU&prototype=1	English		0.4			1990	2030	CO2eq		1	1	1	1		1	1	1									1
European Union	EU27	Annex_I	2020				1		2020-12-17	https://www4.unfccc.int/sites/ndcstaging/Pages/Party.aspx?party=HUN&prototype=1	English		0.55			1990	2030	CO2eq		1	1	1	1		1	1	1										1	1	1	1	1
Fiji	FJI	Non-Annex_I	2016			1			2016-04-22	https://www4.unfccc.int/sites/ndcstaging/Pages/Party.aspx?party=FJI&prototype=1	English		0.1	0.2	0.3	BAU	2030	CO2e		1																	1
Fiji	FJI	Non-Annex_I	2021				1		2020-12-31	https://www4.unfccc.int/sites/ndcstaging/Pages/Party.aspx?party=FJI&prototype=1	English		0.1	0.2	0.3	BAU	2030	CO2e		1	1	1															1
France (overseas territories)			2016			1			2016-10-05	https://www4.unfccc.int/sites/ndcstaging/Pages/Party.aspx?party=FRA&prototype=1	French		New Caledonia: 35% reduction in emissions in the sectorsresidential and tertiary10% reduction in emissions in the mining sectorand metallurgy15% reduction in emissions in thetransport French Polynesia: 15% reduction in CO 2 emissions , i.e. reaching aemission rate of 3.2 TeqCO 2 / inhabitant. by 2030(against 3.8 TeqCO 2 / inhabitant in 2010) Saint-Barthelemy: 15% reduction by 2030 Saint Pierre et…			2010	2030	CO2eq		1	1	1	1		1	1	1									1
France (overseas territories)			2021				1		2021-03-04	https://www4.unfccc.int/sites/ndcstaging/Pages/Party.aspx?party=FRA&prototype=1	French		Limiting the increase in emissions to 8.4% in 2030 compared to 2016			2016	2030	CO2eq		1	1	1	1			1											1		1	1	1	1		1	1
Gabon	GAB	Non-Annex_I	2016			1			2016-11-02	https://www4.unfccc.int/sites/NDCStaging/pages/Party.aspx?party=GAB	French				at least 50%	BAU	2025	CO2eq		1	1	1														1
Gabon	GAB	Non-Annex_I	2022				1		2022-07-06	https://unfccc.int/sites/default/files/NDC/2022-07/20220706_Gabon_Updated%20NDC.pdf	French		Gabon commits without conditionality to remain carbon neutral until and beyond 2050	Conditionally, Gabon will make every effort to ensure a net carbon absorption of at least 100 million tonnes of CO2 per year beyond 2050.		2005	2050	CO2eq		1	1	1							1	1	1	1					1		1		1
Gambia	GMB	Non-Annex_I	2016			1			2016-11-07	https://www4.unfccc.int/sites/ndcstaging/Pages/Party.aspx?party=GMB&prototype=1	English							Mitigation measures		1	1	1	1		1	1	1					1					1	1	1	1	1
Gambia	GMB	Non-Annex_I	2021				1		2021-09-12	https://www4.unfccc.int/sites/ndcstaging/Pages/Party.aspx?party=GMB&prototype=1	English		0.026	0.471	0.497	BAU	2030	CO2eq		1	1	1	1														1	1	1	1	1
Georgia	GEO	Non-Annex_I	2017			1			2017-05-08	https://www4.unfccc.int/sites/ndcstaging/Pages/Party.aspx?party=GEO&prototype=1	English		0.15	0.1	0.25	BAU	2030	CO2eq		1	1	1	1		1	1											1	1	1	1
Georgia	GEO	Non-Annex_I	2021	2030 Climate Change Strategy and Action Plan			1		2021-05-05	https://www4.unfccc.int/sites/ndcstaging/Pages/Party.aspx?party=GEO&prototype=1	English		0.35	25-32%	50-57%	1990	2030	CO2eq		1	1	1	1		1	1	1											1	1	1	1	1	1	1
Ghana	GHA	Non-Annex_I	2016			1			2016-09-21	https://www4.unfccc.int/sites/NDCStaging/pages/Party.aspx?party=GHA	English		0.15	0.3	0.45	BAU	2030	CO2eq		1	1	1	1														1	1	1	1	1
Ghana	GHA	Non-Annex_I	2021				1		2021-11-04	https://www4.unfccc.int/sites/NDCStaging/pages/Party.aspx?party=GHA	English		24.6 MtCO2eq absolute emission reduction	39.4 MtCO2eq absolute emission reduction	64 MtCO2eq absolute emission reduction	2019	2030	CO2eq		1	1	1	1						1	1	1	1	1				1	1		1	1
Grenada	GRD	Non-Annex_I	2016			1			2016-04-21	https://www4.unfccc.int/sites/ndcstaging/Pages/Party.aspx?party=GRD&prototype=1	English		0.3		0.3	2010	2025	CO2 eq		1	1																			1	1	1	1
Grenada	GRD	Non-Annex_I	2020	National Climate Change Policy 2017-2021 NDC Partnership Plan 2019-2023			1		2020-11-30	https://www4.unfccc.int/sites/ndcstaging/Pages/Party.aspx?party=GRD&prototype=1	English		0.4		0.4	2010	2030	CO2 eq		1	1		1	1													1	1		1	1
Guatemala	GTM	Non-Annex_I	2017			1			2017-01-25	https://www4.unfccc.int/sites/NDCStaging/Pages/All.aspx	Spanish		0.112	0.114	0.226	BAU	2030	CO2eq		1	1	1															1	1	1	1	1
Guatemala	GTM	Non-Annex_I	2022						2022-04-01	https://www4.unfccc.int/sites/ndcstaging/Pages/Party.aspx?party=GTM&prototype=1	Spanish		0.112	0.114	0.226	BAU	2030	CO2eq		1	1	1															1	1	1	1	1
Guatemala	GTM	Non-Annex_I	2022				1		2022-05-23	https://www4.unfccc.int/sites/ndcstaging/Pages/Party.aspx?party=GTM&prototype=1	Spanish		0.112	0.114	0.226	BAU	2030	CO2eq		1	1	1															1	1	1	1	1
Guinea	GIN	Non-Annex_I	2016			1			2016-09-21	https://www4.unfccc.int/sites/ndcstaging/Pages/Party.aspx?party=GIN&prototype=1	French				0.13	1994	2030	Mitigation measures		1																	1
Guinea	GIN	Non-Annex_I	2021				1		2021-07-28	https://www4.unfccc.int/sites/ndcstaging/Pages/Party.aspx?party=GIN&prototype=1	French		0.097	0.073	0.17	BAU	2030	CO2eq		1	1	1															1			1	1
Guinea-Bissau	GNB	Non-Annex_I	2018			1			2018-10-22	https://www4.unfccc.int/sites/ndcstaging/Pages/Party.aspx?party=GNB&prototype=1	English							Mitigation measures		1	1	1															1				1
Guinea-Bissau	GNB	Non-Annex_I	2021				1		2021-10-12	https://www4.unfccc.int/sites/ndcstaging/Pages/Party.aspx?party=GNB&prototype=1	English		0.1	0.2	0.3	BAU	2030	CO2eq		1	1	1															1		1	1	1
Guyana	GUY	Non-Annex_I	2016			1	1		2016-05-20	https://www4.unfccc.int/sites/NDCStaging/pages/Party.aspx?party=GUY	English		Mitigation measures	Mitigation measures		Mitigation measures	2025			1																	1				1
Haiti	HTI	Non-Annex_I	2016			1			2016-07-31	https://www4.unfccc.int/sites/NDCStaging/pages/Party.aspx?party=HTI	French		0.05	0.21	0.26	BAU	2030	CO2eq		1	1	1															1		1	1	1
Haiti	HTI	Non-Annex_I	2022				1		2022-06-01	https://unfccc.int/sites/default/files/NDC/2022-06/CDN%20Revisee%20Haiti%202022.pdf	French		0.0632	0.255	0.3182	BAU	2030	CO2eq		1	1	1															1		1	1	1
Honduras	HND	Non-Annex_I	2016	National Climate Change Strategy		1			2016-09-21	https://www4.unfccc.int/sites/ndcstaging/Pages/Party.aspx?party=HND&prototype=1	Spanish			0.15		BAU	2030	CO2eq		1	1	1															1	1	1	1
Honduras	HND	Non-Annex_I	2021				1		2021-05-19	https://www4.unfccc.int/sites/ndcstaging/Pages/Party.aspx?party=HND&prototype=1	Spanish			0.16		BAU	2030	CO2eq		1	1	1	1														1	1	1	1
Iceland	ISL	Annex_I	2016			1			2016-09-21	https://www4.unfccc.int/sites/ndcstaging/Pages/Party.aspx?party=ISL&prototype=1	English		0.4			1990	2030	CO2eq		1	1	1	1		1	1	1										1	1	1	1	1
Iceland	ISL	Annex_I	2021	Climate Action Plan			1		2021-02-18	https://www4.unfccc.int/sites/ndcstaging/Pages/Party.aspx?party=ISL&prototype=1	English		0.55			1990	2030	CO2eq		1	1	1	1		1	1	1										1	1	1	1	1
India	IND	Non-Annex_I	2016			1	1		2016-10-02	https://www4.unfccc.int/sites/NDCStaging/pages/Party.aspx?party=IND	English				To reduce the emissions intensity of its GDP by 33 to 35 percent by 2030 from 2005 level. To achieve about 40 percent cumulative electric power installed capacity from nonfossil fuel based energy resources by 2030 with the help of transfer of technology and low cost international finance including from Green Climate Fund (GCF). . To create an additional carbon sink of 2.5 to 3 billion tonnes of C…	2005	2030	Emission intensity of GDP																1			1	1	1	1	1
Indonesia	IDN	Non-Annex_I	2016			1			2016-11-06	https://www4.unfccc.int/sites/ndcstaging/Pages/Party.aspx?party=IDN&prototype=1	English		0.29	0.12	0.41	BAU	2030	CO2eq		1	1	1															1	1	1	1	1
Indonesia	IDN	Non-Annex_I	2021				1		2021-07-22	https://www4.unfccc.int/sites/ndcstaging/Pages/Party.aspx?party=IDN&prototype=1	English		0.29	0.12	0.41	BAU	2030	CO2eq		1	1	1															1	1	1	1	1
Iraq	IRQ	Non-Annex_I	2021				1		2021-10-15	https://www4.unfccc.int/sites/ndcstaging/Pages/Party.aspx?party=IRQ&prototype=1	Arabic		1-2%	13-14%	0.15	BAU	2030	CO2eq		1	1	1																	1	1		1	1	1	1
Israel	ISR	Non-Annex_I	2016			1			2016-11-22	https://www4.unfccc.int/sites/ndcstaging/Pages/Party.aspx?party=ISR&prototype=1	English		0.26			2005	2030	CO2eq		1	1	1	1		1	1											1	1	1	1
Israel	ISR	Non-Annex_I	2021				1		2021-07-29	https://www4.unfccc.int/sites/ndcstaging/Pages/Party.aspx?party=ISR&prototype=1	English		0.27			2015	2030	CO2eq		1	1	1	1		1	1											1	1	1	1	1
Jamaica	JAM	Non-Annex_I	2017	National Energy Policy 2009-2030		1			2017-04-10	https://www4.unfccc.int/sites/NDCStaging/pages/Party.aspx?party=JAM	English		0.078	0.022	0.1	BAU	2030	CO2eq		1	1	1							1	1	1	1					1
Jamaica	JAM	Non-Annex_I	2020	Third National Communication			1		2020-07-01	https://www4.unfccc.int/sites/NDCStaging/pages/Party.aspx?party=JAM	English		0.254	0.031	0.285	BAU	2030	CO2eq		1	1	1	1														1				1
Japan	JPN	Annex_I	2016			1			2016-11-07	https://www4.unfccc.int/sites/ndcstaging/PublishedDocuments/Japan%20First/20150717_Japan's%20INDC.pdf	English		0.26			2013	2030	CO2eq		1	1	1	1		1	1	1									1	1	1	1	1	1
Japan	JPN	Annex_I	2020	Japan's Long-Term Strategy Plan for Global Warming Countermeasures					2020-03-31	https://www4.unfccc.int/sites/ndcstaging/PublishedDocuments/Japan%20First/SUBMISSION%20OF%20JAPAN'S%20NATIONALLY%20DETERMINED%20CONTRIBUTION%20(NDC).PDF	English		0.26			2013	2030	CO2eq		1	1	1	1		1	1	1									1	1	1	1	1	1
Japan	JPN	Annex_I	2021	INTERIM VERSION SUBMITTED WAIT FOR FINAL			1		2021-10-12	https://www4.unfccc.int/sites/ndcstaging/Pages/Party.aspx?party=JPN&prototype=1	English		0.46			2013	2030	CO2eq		1	1	1	1		1	1	1									1	1	1	1	1	1
Jordan	JOR	Non-Annex_I	2016			1			2016-11-04	https://www4.unfccc.int/sites/ndcstaging/Pages/Party.aspx?party=JOR&prototype=1	English		0.015	0.125	0.14	BAU	2030	CO2eq		1	1	1	1		1	1			1	1	1	1					1	1	1	1	1
Jordan	JOR	Non-Annex_I	2021				1		2021-10-12	https://www4.unfccc.int/sites/ndcstaging/Pages/Party.aspx?party=JOR&prototype=1	English		0.05	0.26	0.31	BAU	2030	CO2eq		1	1	1	1														1	1	1	1	1
Kazakhstan	KAZ	Non-Annex_I	2016	Law On Energy Saving and increase of Energy Efficiency LawOn Support of the Use of Renewable Energy Sources		1	1		2016-12-06	https://www4.unfccc.int/sites/NDCStaging/pages/Party.aspx?party=KAZ	English		0.15	0.1	0.25	1990	2030	CO2eq		1	1	1	1		1	1										1	1	1	1	1	1
Kenya	KEN	Non-Annex_I	2016	Kenya Climate Smart Agriculture Strategy		1			2016-12-27	https://www4.unfccc.int/sites/ndcstaging/Pages/Party.aspx?party=KEN&prototype=1	English			30% compared to BAU	0.3		2030	CO2eq		1	1	1															1	1	1	1	1	1
Kenya	KEN	Non-Annex_I	2020	National Climate Change Action Plan 2018-2022			1		2020-12-27	https://www4.unfccc.int/sites/ndcstaging/Pages/Party.aspx?party=KEN&prototype=1	English		21% of mitigation cost (i.e. 21% of 32% target)	32% compared to BAU	0.32		2030	CO2eq		1	1	1															1	1	1	1	1
Kiribati	KIR	Non-Annex_I	2016			1	1		2016-09-21	https://www4.unfccc.int/sites/NDCStaging/pages/Party.aspx?party=KIR	English		0.128	0.49	0.618	BAU	2030	CO2eq		1																	1				1
Kuwait	KWT	Non-Annex_I	2018			1			2018-04-23	https://www4.unfccc.int/sites/ndcstaging/Pages/Party.aspx?party=KWT&prototype=1	Arabic							Mitigation measures																1			1
Kuwait	KWT	Non-Annex_I	2021				1		2021-10-12	https://www4.unfccc.int/sites/ndcstaging/Pages/Party.aspx?party=KWT&prototype=1	Arabic		0.074		0.074	BAU	2035	CO2eq		1	1	1															1	1	1		1
Kyrgyzstan	KGZ	Non-Annex_I	2020						2020-02-18	https://www4.unfccc.int/sites/ndcstaging/Pages/Party.aspx?party=KGZ&prototype=1	Russian		11.49-13.75%		29-30.89%	BAU	2030	CO2eq		1	1	1	1		1	1	1										1	1	1	1	1
Kyrgyzstan	KGZ	Non-Annex_I	2021				1		2021-10-09	https://www4.unfccc.int/sites/ndcstaging/Pages/Party.aspx?party=KGZ&prototype=1	Russian		0.1597	27.65	0.4362	BAU	2030	CO2eq		1	1	1	1													1
Laos	LAO	Non-Annex_I	2016			1			2016-09-07	https://www4.unfccc.int/sites/ndcstaging/Pages/Party.aspx?party=LAO&prototype=1	English							Mitigation measures																			1				1	1
Laos	LAO	Non-Annex_I	2021				1		2021-05-11	https://www4.unfccc.int/sites/ndcstaging/Pages/Party.aspx?party=LAO&prototype=1	English		0.6			BAU	2030	CO2eq		1	1	1															1	1	1	1	1
Lebanon	LBN	Non-Annex_I	2015			1			2020-02-05	https://www4.unfccc.int/sites/ndcstaging/Pages/Party.aspx?party=LBN&prototype=1	English		0.15	0.15	0.3	BAU	2030	CO2eq		1	1	1															1	1	1	1	1
Lebanon	LBN	Non-Annex_I	2021	National Coolin Plan National Agriculture Strategy Policy Paper for the Electriicty Sector			1		2021-03-16	https://www4.unfccc.int/sites/ndcstaging/Pages/Party.aspx?party=LBN&prototype=1	English		0.2	0.11	0.31	BAU	2030	CO2eq		1	1	1															1	1	1	1	1
Lesotho	LSO	Non-Annex_I	2017						2017-01-20	https://www4.unfccc.int/sites/NDCStaging/pages/Party.aspx?party=LSO	English		0.1	0.25	0.35	BAU	2030	CO2eq		1	1	1															1		1	1
Lesotho	LSO	Non-Annex_I	2018	National Climate Change Policy National Energy Policy 2015-2025		1	1		2018-06-22	https://www4.unfccc.int/sites/NDCStaging/pages/Party.aspx?party=LSO	English		0.1	0.25	0.35	BAU	2030	CO2eq		1	1	1															1	1	1	1	1
Liberia	LBR	Non-Annex_I	2018			1			2018-08-27	https://www4.unfccc.int/sites/ndcstaging/Pages/Party.aspx?party=LBR&prototype=1	English			0.15	0.15	BAU	2030	CO2eq		1	1	1															1			1		1
Liberia	LBR	Non-Annex_I	2021				1		2021-08-04	https://www4.unfccc.int/sites/ndcstaging/Pages/Party.aspx?party=LBR&prototype=1	English		0.1	0.54	0.64	BAU	2030	CO2eq		1	1	1	1						1	1	1	1					1	1	1	1	1
Liechtenstein	LIE	Annex_I	2017			1	1		2017-09-20	https://www4.unfccc.int/sites/NDCStaging/pages/Party.aspx?party=LIE	English		0.4		0.4	1990	2030	CO2eq		1	1	1	1		1	1	1										1	1	1	1	1
Madagascar	MDG	Non-Annex_I	2016			1	1		2016-09-21	https://www4.unfccc.int/sites/NDCStaging/pages/Party.aspx?party=MDG	French			14% emission reduction 32% increase in GHG absorption	14% emission reduction 32% increase in GHG absorption	BAU	2030	CO2eq		1	1	1															1		1	1	1
Malawi	MWI	Non-Annex_I	2017			1			2017-06-29	https://www4.unfccc.int/sites/ndcstaging/Pages/Party.aspx?party=MWI&prototype=1	English							Mitigation measures		1	1	1															1	1	1	1	1
Malawi	MWI	Non-Annex_I	2021				1		2021-07-30	https://www4.unfccc.int/sites/ndcstaging/Pages/Party.aspx?party=MWI&prototype=1	English		0.06	0.45	0.51	BAU	2040	CO2eq		1	1	1															1	1	1	1	1
Malaysia	MYS	Non-Annex_I	2016			1			2016-11-16	https://www4.unfccc.int/sites/ndcstaging/Pages/Party.aspx?party=MYS&prototype=1	English		0.35	0.1	0.45	2005	2030	GHG emission intensity of GDP		1	1	1															1	1	1	1	1
Malaysia	MYS	Non-Annex_I	2021				1		2021-07-30	https://www4.unfccc.int/sites/ndcstaging/Pages/Party.aspx?party=MYS&prototype=1	English		0.45		0.45	2005	2030	GHG emission intensity of GDP		1	1	1	1		1	1	1										1	1	1	1	1
Maldives	MDV	Non-Annex_I	2016			1			2016-04-21	https://www4.unfccc.int/sites/ndcstaging/Pages/Party.aspx?party=MDV&prototype=1	English		0.1	0.14	0.24	BAU	2030	CO2eq		1	1																1			1		1
Maldives	MDV	Non-Annex_I	2020				1		2020-12-27	https://www4.unfccc.int/sites/ndcstaging/Pages/Party.aspx?party=MDV&prototype=1	English			0.26	0.26	BAU	2030	CO2eq		1	1	1															1			1
Mali	MLI	Non-Annex_I	2016			1			2016-09-23	https://www4.unfccc.int/sites/ndcstaging/Pages/Party.aspx?party=MLI&prototype=1	French			29% agriculture 31% energy 21% FOLU	29% agriculture 31% energy 21% FOLU	BAU	2030	CO2eq		1	1	1															1		1		1
Mali	MLI	Non-Annex_I	2021				1		2021-10-11	https://www4.unfccc.int/sites/ndcstaging/Pages/Party.aspx?party=MLI&prototype=1	French			25% agriculture 31% energy 39% FOLU 31% waste 40% total	25% agriculture 31% energy 39% FOLU 31% waste 40% total	BAU	2030	CO2eq		1	1	1									1	1					1		1	1	1
Marshall Islands	MHL	Non-Annex_I	2016						2016-04-22	https://www4.unfccc.int/sites/ndcstaging/Pages/Party.aspx?party=MHL&prototype=1	English		0.32			2010	2025	CO2eq		1	1	1															1			1
Marshall Islands	MHL	Non-Annex_I	2018	Tile Til Eo 2050 Climate Strategy					2018-11-22	https://www4.unfccc.int/sites/ndcstaging/Pages/Party.aspx?party=MHL&prototype=1	English		32% 2025 45% 2030			2010	2025/2030	CO2eq		1	1	1															1			1
Marshall Islands	MHL	Non-Annex_I	2020	Tile Til Eo 2050 Climate Strategy		1	1		2020-12-31	https://www4.unfccc.int/sites/ndcstaging/Pages/Party.aspx?party=MHL&prototype=1	English		32% 2025 45% 2030 40% reduction in domestic shipping emissions by 2030, full decarbonisation by 2050			2010	2025/2030	CO2eq		1	1	1															1			1		1
Mauritania	MRT	Non-Annex_I	2017			1			2017-02-27	https://www4.unfccc.int/sites/ndcstaging/Pages/Party.aspx?party=MRT&prototype=1	French		0.0268	0.1784	0.223	BAU	2030	CO2eq		1	1	1															1	1	1	1	1
Mauritania	MRT	Non-Annex_I	2021				1		2021-10-12	https://www4.unfccc.int/sites/ndcstaging/Pages/Party.aspx?party=MRT&prototype=1	French		0.11	0.92	1.03	BAU	2030	CO2eq																			1	1	1	1	1
Mauritius	MUS	Non-Annex_I	2016			1			2016-04-22	https://www4.unfccc.int/sites/ndcstaging/Pages/Party.aspx?party=MUS&prototype=1	English			0.3	0.3	BAU	2030	CO2eq		1																	1	1	1	1	1
Mauritius	MUS	Non-Annex_I	2021				1		2021-10-05	https://www4.unfccc.int/sites/ndcstaging/Pages/Party.aspx?party=MUS&prototype=1	English			0.4	0.4	BAU	2030	CO2eq		1	1	1	1														1	1	1	1	1
Mexico	MEX	Non-Annex_I	2016	National climate change startegy 10-20-40 vision		1			2016-09-20	https://www4.unfccc.int/sites/ndcstaging/Pages/Party.aspx?party=MEX&prototype=1	English		0.22	0.14	0.36	BAU	2030	CO2e		1	1	1	1		1	1							1				1	1	1	1	1
Mexico	MEX	Non-Annex_I	2020				1		2020-12-29	https://www4.unfccc.int/sites/ndcstaging/Pages/Party.aspx?party=MEX&prototype=1	Spanish		0.22	0.14	0.36	BAU	2030	CO2e		1	1	1	1		1	1							1				1	1	1	1
Micronesia	FSM	Non-Annex_I	2016			1	1		2016-09-15	https://www4.unfccc.int/sites/NDCStaging/pages/Party.aspx?party=FSM	English		0.25	0.07	0.35	2000	2025	CO2eq		1																						1	1
Moldova	MDA	Non-Annex_I	2017			1			2017-06-19	https://www4.unfccc.int/sites/ndcstaging/PublishedDocuments/Republic%20of%20Moldova%20First/INDC_Republic_of_Moldova_25.09.2015.pdf	English		64-67%	0.78	0.78	1990	2030	CO2eq		1	1	1	1		1	1	1										1	1	1	1	1
Moldova	MDA	Non-Annex_I	2020	2nd Biennial Update Report			1		2020-03-03	https://www4.unfccc.int/sites/ndcstaging/PublishedDocuments/Republic%20of%20Moldova%20Second/MD_Updated_NDC_final_version_EN.pdf	English		0.7	0.88	0.88	1990	2030	CO2eq		1	1	1	1		1	1	1										1	1	1	1	1
Monaco	MCO	Annex_I	2016			1			2016-10-25	https://www4.unfccc.int/sites/ndcstaging/Pages/Party.aspx?party=MCO&prototype=1	French		50% compared to 1990 levels			1990	2030	CO2eq		1	1	1	1		1	1	1									1
Monaco	MCO	Annex_I	2020	Plan Climat Air Energie 2030			1		2020-12-27	https://www4.unfccc.int/sites/ndcstaging/Pages/Party.aspx?party=MCO&prototype=1	French		55% compared to 1990 levels			1990	2030	CO2eq		1	1	1	1		1	1	1									1
Mongolia	MNG	Non-Annex_I	2016			1			2016-09-20	https://www4.unfccc.int/sites/ndcstaging/Pages/Party.aspx?party=MNG&prototype=1	English		0.14			BAU	2030	CO2eq		1	1	1															1	1	1	1
Mongolia	MNG	Non-Annex_I	2020				1		2020-10-13	https://www4.unfccc.int/sites/ndcstaging/Pages/Party.aspx?party=MNG&prototype=1	English		0.227	0.045	27.2 (exc. Forestry)	BAU	2030	CO2 eq		1	1	1	1														1	1	1	1	1
Montenegro	SCG	Non-Annex_I	2017	National Climate Change Strategy		1			2017-12-21	https://www4.unfccc.int/sites/ndcstaging/Pages/Party.aspx?party=MNE&prototype=1	English		0.3		0.3	1990	2030	CO2eq		1	1	1	1		1	1	1										1	1	1	1
Montenegro	SCG	Non-Annex_I	2021				1		2021-06-15	https://www4.unfccc.int/sites/ndcstaging/Pages/Party.aspx?party=MNE&prototype=1	English		0.35		0.35	1990	2030	CO2eq		1	1	1	1		1	1											1	1	1	1
Morocco	MAR	Non-Annex_I	2016			1			2016-09-19	https://www4.unfccc.int/sites/ndcstaging/Pages/Party.aspx?party=MAR&prototype=1	French		0.17	0.25	0.42	BAU	2030	CO2eq		1	1	1																	1	1	1	1	1	1	1
Morocco	MAR	Non-Annex_I	2021				1		2021-06-22	https://www4.unfccc.int/sites/ndcstaging/Pages/Party.aspx?party=MAR&prototype=1	French		0.183	0.272	0.455	BAU	2030	CO2eq		1	1	1	1						1	1	1	1				1
Mozambique	MOZ	Non-Annex_I	2016	Strategy for New and Renewable Development 2011-2025 National Gas Masterplan Biomass Energy Strategy NATIONAL CLIMATE CHANGE ADAPTATION AND MITIGATION STRATEG		1			2018-06-04	https://www4.unfccc.int/sites/NDCStaging/pages/Party.aspx?party=MOZ	English			76.5 MtCO2eq emissions reduced by 2030 23 MtCO2eq emissions reduced by 2024 53.4 MtCO2eq emission reduced between 2025 and 2030	76.5 MtCO2eq emissions reduced by 2030 23 MtCO2eq emissions reduced by 2024 53.4 MtCO2eq emission reduced between 2025 and 2030	BAU	2030	CO2eq		1	1	1															1			1	1
Mozambique	MOZ	Non-Annex_I	2021				1		2021-12-27	https://www4.unfccc.int/sites/NDCStaging/pages/Party.aspx?party=MOZ	English				40 MtCO2eq emissions reduced between 2020-2025	BAU	2025	CO2eq		1	1	1															1	1	1	1	1
Myanmar	MMR	Non-Annex_I	2017			1			2017-09-19	https://www4.unfccc.int/sites/ndcstaging/Pages/Party.aspx?party=MMR&prototype=1	English							Mitigation measures
Myanmar	MMR	Non-Annex_I	2021				1		2021-08-03	https://www4.unfccc.int/sites/ndcstaging/Pages/Party.aspx?party=MMR&prototype=1	English		244.52 MtCO2eq	170.23 MtCO2eq	414.75 Mt CO2eq	Absolute emission reduction	2030	CO2eq																1			1		1	1	1
Namibia	NAM	Non-Annex_I	2016			1			2016-09-21	https://www4.unfccc.int/sites/ndcstaging/Pages/Party.aspx?party=NAM&prototype=1	English		0.1	0.79	0.89	BAU	2030	CO2eq		1	1	1															1	1	1	1	1
Namibia	NAM	Non-Annex_I	2021				1		2021-07-30	https://www4.unfccc.int/sites/ndcstaging/Pages/Party.aspx?party=NAM&prototype=1	English				0.91	BAU	2030	CO2eq		1	1	1	1														1	1	1	1	1
Nauru	NRU	Non-Annex_I	2016			1			2016-04-07	https://www4.unfccc.int/sites/ndcstaging/Pages/Party.aspx?party=NRU&prototype=1	English							Mitigation measures		1																	1
Nauru	NRU	Non-Annex_I	2021				1		2021-10-14	https://www4.unfccc.int/sites/ndcstaging/Pages/Party.aspx?party=NRU&prototype=1	English							Mitigation measures																1			1			1
Nepal	NPL	Non-Annex_I	2016			1			2016-10-04	https://www4.unfccc.int/sites/ndcstaging/Pages/Party.aspx?party=NPL&prototype=1	English		N.A.		N.A.	Measure-based NDC		Mitigation actions
Nepal	NPL	Non-Annex_I	2020				1		2020-12-08	https://www4.unfccc.int/sites/ndcstaging/Pages/Party.aspx?party=NPL&prototype=1	English		N.A.		N.A.	Measure-based NDC		Mitigation actions		1	1	1															1	1	1	1	1
New Zealand	NZL	Annex_I	2016			1			2016-10-04	https://www4.unfccc.int/sites/ndcstaging/PublishedDocuments/New%20Zealand%20First/New%20Zealand%20first%20NDC.pdf	English		0.3		0.3	2005	2030	CO2eq		1	1	1	1		1	1	1										1	1	1	1	1
New Zealand	NZL	Annex_I	2020	Climate Change Response (Zero Carbon) Amendment Act			1		2020-04-22	https://www4.unfccc.int/sites/ndcstaging/PublishedDocuments/New%20Zealand%20First/NEW%20ZEALAND%20NDC%20update%2022%2004%202020.pdf	English		1. net zero GHG emissions by 2050 24-27% reduction in biogenic methane emissions			2017	2050	CO2eq																1
Nicaragua	NIC	Non-Annex_I	2018			1			2018-09-02	https://www4.unfccc.int/sites/ndcstaging/Pages/Party.aspx?party=NIC&prototype=1	Spanish		Measures in energy and LULUCF sector			2010	2030	Mitigation measures																			1				1
Nicaragua	NIC	Non-Annex_I	2020				1		2020-12-23	https://www4.unfccc.int/sites/ndcstaging/Pages/Party.aspx?party=NIC&prototype=1	Spanish		Measures in energy and LULUCF sector			2015	2030	Mitigation measures																			1	1			1
Niger	NER	Non-Annex_I	2016			1			2016-09-21	https://www4.unfccc.int/sites/NDCStaging/pages/Party.aspx?party=NER	French		0.035	0.311	0.346	BAU	2030	CO2eq		1	1	1															1		1		1
Niger	NER	Non-Annex_I	2021				1		2021-12-13	https://www4.unfccc.int/sites/NDCStaging/pages/Party.aspx?party=NER	French		12.57% - AFOLU 10.6% - Energy	10.18% - AFOLU 34.4% - Energy	22.75% - AFOLU 45% - Energy	BAU	2030	CO2eq		1	1	1															1		1		1
Nigeria	NGA	Non-Annex_I	2017			1			2017-05-16	https://www4.unfccc.int/sites/ndcstaging/Pages/Party.aspx?party=NGA&prototype=1	English		0.2	0.25	0.45	BAU	2030	CO2eq		1	1	1														1
Nigeria	NGA	Non-Annex_I	2021				1		2021-07-30	https://www4.unfccc.int/sites/ndcstaging/Pages/Party.aspx?party=NGA&prototype=1	English		0.2	0.27	0.47	BAU	2030	CO2eq		1	1	1	1													1
Niue	NIU	Non-Annex_I	2016			1	1		2016-10-28	https://www4.unfccc.int/sites/NDCStaging/pages/Party.aspx?party=NIU	English		38% share of renewable energy in electricity generation by 2020	42% share of renewable energy in electricity generation by 2025	80% share of renewable energy in electricity generation by 2025	BAU	2025	% renewable electricity production		1	1	1																					1
North Korea	PRK	Non-Annex_I	2016						2016-10-03	https://www4.unfccc.int/sites/NDCStaging/pages/Party.aspx?party=PRK	English		0.08	0.3225	0.4025	BAU	2030	CO2eq		1	1	1	1		1	1											1	1	1	1	1
North Korea	PRK	Non-Annex_I	2019			1	1		2019-09-19	https://www4.unfccc.int/sites/NDCStaging/pages/Party.aspx?party=PRK	English		0.164	0.36	0.524	BAU	2030	CO2eq		1																	1		1		1
North Macedonia	MKD	Non-Annex_I	2018			1			2018-01-09	https://www4.unfccc.int/sites/ndcstaging/Pages/Party.aspx?party=MKD&prototype=1	English		0.3	0.06	0.36	BAU	2030	CO2eq		1																	1					1		1
North Macedonia	MKD	Non-Annex_I	2021	Enhanced NDC technical background document			1		2021-04-16	https://www4.unfccc.int/sites/ndcstaging/Pages/Party.aspx?party=MKD&prototype=1	English		0.51			1990	2030	CO2eq		1	1	1															1	1	1	1
Norway	NOR	Annex_I	2016			1			2016-06-19	https://www4.unfccc.int/sites/ndcstaging/PublishedDocuments/Norway%20First/NorwayINDC%20(Archived).pdf	English		0.4	NA	0.4	1990	2030	CO2eq		1	1	1	1		1	1	1										1	1	1	1	1
Norway	NOR	Annex_I	2020	7th National Communication 4th Biennial Report			1		2020-02-06	https://www4.unfccc.int/sites/ndcstaging/PublishedDocuments/Norway%20First/Norway_updatedNDC_2020%20(Updated%20submission).pdf	English		At least 50% and towards 55%			1990	2030	CO2eq		1	1	1	1		1	1	1										1	1	1	1	1
Oman	OMN	Non-Annex_I	2015			1			2019-05-22	https://www4.unfccc.int/sites/ndcstaging/Pages/Party.aspx?party=OMN&prototype=1	Arabic			0.02	0.02	BAU	2030	CO2eq		1	1	1		1	1												1	1		1
Oman	OMN	Non-Annex_I	2021				1		2021-07-29	https://www4.unfccc.int/sites/ndcstaging/Pages/Party.aspx?party=OMN&prototype=1	English			0.07	0.07	BAU	2030	CO2eq		1	1	1															1
Pakistan	PAK	Non-Annex_I	2016			1			2016-11-10	https://www4.unfccc.int/sites/ndcstaging/Pages/Party.aspx?party=PAK&prototype=1	English			0.2	0.2	BAU	2030	CO2eq		1	1	1															1		1
Pakistan	PAK	Non-Annex_I	2021				1		2021-10-12	https://www4.unfccc.int/sites/ndcstaging/Pages/Party.aspx?party=PAK&prototype=1	English		0.15	0.35	0.5	BAU	2030	CO2eq		1	1	1															1	1	1	1	1
Palau	PLW	Non-Annex_I	2016			1	1		2016-04-22	https://www4.unfccc.int/sites/NDCStaging/pages/Party.aspx?party=PLW	English				Indicative targets: ₋ 22% energy sector emissions reductions below 2005 levels by 2025 ₋ 45% Renewable Energy target by 2025 ₋ 35% Energy Efficiency target by 2025			Sectoral targets		1	1																1			1
Palestine	PSE	Non-Annex_I	2017			1			2017-08-21	https://www4.unfccc.int/sites/ndcstaging/Pages/Party.aspx?party=PSE&prototype=1	English			12.8% (status quo) 24.4% (independence)	12.8% (status quo) 24.4% (independence)	BAU	2040	CO2eq		1	1	1															1	1	1	1	1
Palestine	PSE	Non-Annex_I	2021				1		2021-10-10	https://www4.unfccc.int/sites/ndcstaging/Pages/Party.aspx?party=PSE&prototype=1	English			17.5% (status quo) 26.6% (independence)	17.5% (status quo) 26.6% (independence)	BAU	2040	CO2eq		1	1	1															1	1	1	1	1
Panama	PAN	Non-Annex_I	2016			1			2016-04-17	https://www4.unfccc.int/sites/ndcstaging/Pages/Party.aspx?party=PAN&prototype=1	Spanish		Measures in energy and LULUCF sector					Mitigation measures		1																	1				1
Panama	PAN	Non-Annex_I	2020				1		2020-12-27	https://www4.unfccc.int/sites/ndcstaging/Pages/Party.aspx?party=PAN&prototype=1	Spanish		Sectoral commitments					% reductions in specific sectors		1	1	1															1				1
Papua New Guinea	PNG	Non-Annex_I	2016	Climate Change Management Act 2015		1			2016-03-23	https://www4.unfccc.int/sites/ndcstaging/Pages/Party.aspx?party=PNG&prototype=1	English		N.A.							1	1																1
Papua New Guinea	PNG	Non-Annex_I	2020	NDC Implementation Plan			1		2020-12-15	https://www4.unfccc.int/sites/ndcstaging/Pages/Party.aspx?party=PNG&prototype=1	English			Carbon neutrality in Energy By 2030, PNG is committing to a reduction in annual emission from deforestation and forest degradation, due to agriculture expansion and commercial logging of 10,000 Gg CO2 eq compared to 2015 level.			2030	CO2eq																1			1				1
Paraguay	PRY	Non-Annex_I	2016	Plan Nacional de Cambio Climático – Fase 1– Estrategia de Mitigación		1			2016-10-14	https://www4.unfccc.int/sites/ndcstaging/Pages/Party.aspx?party=PRY&prototype=1	Spanish		0.1	0.1	0.2	BAU	2030	CO2eq		1	1	1	1		1	1	1									1
Paraguay	PRY	Non-Annex_I	2021				1		2021-07-16	https://www4.unfccc.int/sites/ndcstaging/Pages/Party.aspx?party=PRY&prototype=1	Spanish		0.1	0.1	0.2	BAU	2030	CO2eq		1	1	1	1		1	1										1
Peru	PER	Non-Annex_I	2016			1			2016-07-24	https://www4.unfccc.int/sites/ndcstaging/Pages/Party.aspx?party=PER&prototype=1	Spanish		0.2	0.1	0.3		2030	CO2eq		1	1	1														1
Peru	PER	Non-Annex_I	2020	RENAMI (National Registry of Climat Change Mitigation Actions, Accessed 04/04/2021)			1		2020-12-18	https://www4.unfccc.int/sites/ndcstaging/Pages/Party.aspx?party=PER&prototype=1	Spanish		208.8 Mt CO2 eq emissions in 2030	179.0 Mt CO2 eq emissions in 2030			2030	CO2eq		1	1	1	1		1	1											1	1	1	1	1
Philippines	PHL	Non-Annex_I	2021				1		2021-04-15	https://www4.unfccc.int/sites/ndcstaging/Pages/Party.aspx?party=PHL&prototype=1	English		0.0271	0.7229	0.75	BAU	2030	CO2eq		1	1	1	1		1												1	1	1	1
Qatar	QAT	Non-Annex_I	2017			1			2017-06-23	https://www4.unfccc.int/sites/ndcstaging/Pages/Party.aspx?party=QAT&prototype=1	Arabic							Mitigation measures																1			1			1
Qatar	QAT	Non-Annex_I	2021				1		2021-08-24	https://www4.unfccc.int/sites/ndcstaging/Pages/Party.aspx?party=QAT&prototype=1	Arabic			0.25	0.25	BAU	2030	CO2eq		1	1	1															1			1				1	1
Republic of Korea	KOR	Non-Annex_I	2016			1			2016-11-02	https://www4.unfccc.int/sites/ndcstaging/Pages/Party.aspx?party=KOR&prototype=1	English		0.37			BAU	2030	CO2e		1	1	1	1		1	1										1
Republic of Korea	KOR	Non-Annex_I	2020	2nd Basic Plan for Climate Change Response					2020-12-29	https://www4.unfccc.int/sites/ndcstaging/Pages/Party.aspx?party=KOR&prototype=1	English		0.244			2017	2030	CO2e		1	1	1	1		1	1											1	1	1	1	1
Republic of Korea	KOR	Non-Annex_I	2021				1		2021-12-23	https://www4.unfccc.int/sites/NDCStaging/pages/Party.aspx?party=KOR	English		0.4			2018	2030	CO2eq		1	1	1	1		1	1											1	1	1	1	1
Russia	RUS	Annex_I	2020	Energy efficiency legislation (Federal Law 261-FZ, On Saving Energy and Increasing Energy efficiency Increase and Amending Certain Legislative Acts of the Russian Federation) Russian Federation 2009: http://climatepolicydatabase.org/index.php/Energy_efficiency_legislation_(Federal_Law_261-FZ,_%C2%80%C2%9COn_Saving_Energy_and_Increasing_Energy_efficiency_Increase_and_Amending_Certain_Legislati…			1		2020-11-25	https://www4.unfccc.int/sites/ndcstaging/Pages/Party.aspx?party=RUS&prototype=1	English/Russian		0.3		0.3	1990	2030	CO2 eq		1	1	1	1		1	1	1									1	1	1	1	1	1
Rwanda	RWA	Non-Annex_I	2016	National Strategy for Climate Change and Low Carbon Development Strategy		1			2016-10-05	https://www4.unfccc.int/sites/ndcstaging/PublishedDocuments/Rwanda%20First/INDC_Rwanda_Nov.2015.pdf	English		Not quantified			BAU	2030			1	1	1															1	1		1		1
Rwanda	RWA	Non-Annex_I	2020	National Strategy for Climate Change and Low Carbon Development Strategy National Environment and Climate Change Policy Rwanda's third national communication			1		2020-05-19	https://www4.unfccc.int/sites/ndcstaging/PublishedDocuments/Rwanda%20First/Rwanda_Updated_NDC_May_2020.pdf	English		0.16	0.22	0.38	BAU	2030			1	1	1	1														1	1	1	1
Samoa	WSM	Non-Annex_I	2016			1			2016-04-22	https://www4.unfccc.int/sites/ndcstaging/Pages/Party.aspx?party=WSM&prototype=1	English							Mitigation measures		1																							1
Samoa	WSM	Non-Annex_I	2021				1		2021-07-30	https://www4.unfccc.int/sites/ndcstaging/Pages/Party.aspx?party=WSM&prototype=1	English			0.26	0.26	2007	2030	CO2eq		1	1	1							1	1	1	1					1		1	1	1
San Marino	SMR	Annex_I	2018			1	1		2018-09-26	https://www4.unfccc.int/sites/NDCStaging/pages/Party.aspx?party=SMR	English		0.2			2005	2030	CO2eq		1	1	1	1		1	1	1										1	1	1	1	1
Sao Tome and Principe	STP	Non-Annex_I	2015			1			2016-11-02	https://www4.unfccc.int/sites/ndcstaging/Pages/Party.aspx?party=STP&prototype=1	English			0.24	0.24	2005	2030	CO2eq		1	1											1				1
Sao Tome and Principe	STP	Non-Annex_I	2021				1		2021-07-30	https://www4.unfccc.int/sites/ndcstaging/Pages/Party.aspx?party=STP&prototype=1	English			0.27	0.27	BAU	2030	CO2eq		1	1	1														1
Saudi Arabia	SAU	Non-Annex_I	2016			1			2016-11-03	https://www4.unfccc.int/sites/ndcstaging/Pages/Party.aspx?party=SAU&prototype=1	Arabic		130 million tonnes CO2eq reduced annually		130 million tonnes CO2eq reduced annually	BAU	2030	CO2eq		1	1																1
Saudi Arabia	SAU	Non-Annex_I	2021				1		2021-10-23	https://www4.unfccc.int/sites/ndcstaging/Pages/Party.aspx?party=SAU&prototype=1	English		278 million tonnes CO2eq reduced annually			BAU	2030	CO2eq		1	1																1
Senegal	SEN	Non-Annex_I	2020				1		2020-12-28	https://www4.unfccc.int/sites/ndcstaging/Pages/Party.aspx?party=SEN&prototype=1	French		0.0703	0.225	0.2953	BAU	2030	CO2eq		1	1	1															1	1	1	1	1
Serbia	SCG	Non-Annex_I	2017			1	1		2015-07-25	https://www4.unfccc.int/sites/NDCStaging/pages/Party.aspx?party=SRB	English		0.098		0.098	1990	2030	CO2eq		1	1	1	1		1	1										1
Seychelles	SYC	Non-Annex_I	2016			1			2016-04-29	https://www4.unfccc.int/sites/ndcstaging/Pages/Party.aspx?party=SYC&prototype=1	English			0.29	0.29	BAU	2030	CO2eq		1	1																1			1
Seychelles	SYC	Non-Annex_I	2021				1		2021-07-30	https://www4.unfccc.int/sites/ndcstaging/Pages/Party.aspx?party=SYC&prototype=1	English			0.264	0.264	BAU	2030	CO2eq		1	1		1														1	1		1		1
Sierra Leone	SLE	Non-Annex_I	2016			1			2016-11-01	https://www4.unfccc.int/sites/ndcstaging/Pages/Party.aspx?party=SLE&prototype=1	English			7.58 MtCO2e	7.58 MtCO2e		2035	CO2eq		1	1	1															1	1	1	1	1
Sierra Leone	SLE	Non-Annex_I	2021				1		2021-07-31	https://www4.unfccc.int/sites/ndcstaging/Pages/Party.aspx?party=SLE&prototype=1	English				0.1	BAU	2030	CO2eq		1	1	1									1						1	1	1	1	1
Singapore	SGP	Non-Annex_I	2016	National Climate Change Strategy 2012 Sustainable Singapore Blueprint 2015		1			2016-09-20	https://www4.unfccc.int/sites/ndcstaging/PublishedDocuments/Singapore%20First/Singapore%20INDC.pdf	English		36% (emission intensity (kgCO2e/S$)			2005	2030	kgCO2e/S$		1	1	1	1		1	1										1	1	1	1	1	1
Singapore	SGP	Non-Annex_I	2020	National Climate Change Action Plan Charting Singapore's Low Carbon and Climate Resilient Future			1		2020-03-30	https://www4.unfccc.int/sites/ndcstaging/PublishedDocuments/Singapore%20First/Singapore's%20Update%20of%201st%20NDC.pdf	English		peak emissions at 65 MtCO2e around 2030		peak emissions at 65 MtCO2e around 2030	Absolute target	2030	CO2eq		1	1	1	1		1	1	1									1	1	1	1	1	1
Solomon Islands	SLB	Non-Annex_I	2016			1			2016-09-21	https://www4.unfccc.int/sites/ndcstaging/Pages/Party.aspx?party=SLB&prototype=1	English		0.3	0.15	0.45	BAU	2030	CO2eq		1																	1				1
Solomon Islands	SLB	Non-Annex_I	2021				1		2021-07-19	https://www4.unfccc.int/sites/ndcstaging/Pages/Party.aspx?party=SLB&prototype=1	English		0.33	0.12	0.45	BAU	2030	CO2eq		1																	1		1		1
Somalia	SOM	Non-Annex_I	2016			1			2016-04-22	https://www4.unfccc.int/sites/ndcstaging/Pages/Party.aspx?party=SOM&prototype=1	English							Mitigation measures																					1		1		1		1
Somalia	SOM	Non-Annex_I	2021				1		2021-07-31	https://www4.unfccc.int/sites/ndcstaging/Pages/Party.aspx?party=SOM&prototype=1	Enlgish			0.3	0.3	BAU	2030	CO2eq		1	1	1															1		1	1	1
South Africa	ZAF	Non-Annex_I	2016			1			2016-11-01	https://www4.unfccc.int/sites/ndcstaging/Pages/Party.aspx?party=ZAF&prototype=1	English				398-614 Mt CO2-eq	2020 (peak, plateau, decline trajectory range)	2025/2030			1	1	1															1	1	1	1	1
South Africa	ZAF	Non-Annex_I	2021	Integrated Resource Plan 2019 Green Transport Strategy 4th Biennial Update Report			1		2021-09-27	https://www4.unfccc.int/sites/ndcstaging/Pages/Party.aspx?party=ZAF&prototype=1	English			398-510 Mt CO2eq 350-420 MtCO2eq	398-510 Mt CO2eq 350-420 MtCO2eq	Emission range in target year	2025 2030	CO2eq		1	1	1	1		1												1	1	1	1	1
South Sudan	SSD	Non-Annex_I	2015			1			2021-02-23	https://www4.unfccc.int/sites/ndcstaging/Pages/Party.aspx?party=SSD&prototype=1	English		measure-based			2016	2030			1																	1				1	1
South Sudan	SSD	Non-Annex_I	2021				1		2021-09-21	https://www4.unfccc.int/sites/ndcstaging/Pages/Party.aspx?party=SSD&prototype=1	English			109.7 million tonnes reduction, 45.06 million tonnes sequestered			2030	CO2eq
Sri Lanka	LKA	Non-Annex_I	2016			1			2016-11-06	https://www4.unfccc.int/sites/ndcstaging/Pages/Party.aspx?party=LKA&prototype=1	English		4% - Energy 3% - Others (transport, industry, forests and waste)	16% - Energy 7% - Others (transport, industry, forests and waste)	20% - Energy 10% - Others (transport, industry, forests and waste)	BAU	2030	CO2eq		1	1	1																1		1	1	1	1
Sri Lanka	LKA	Non-Annex_I	2021				1		2021-09-24	https://www4.unfccc.int/sites/ndcstaging/Pages/Party.aspx?party=LKA&prototype=1	English		0.04	0.105	0.145	BAU	2030	CO2eq																1				1		1	1	1	1
St Kitts and Nevis	KNA	Non-Annex_I	2016			1			2016-04-22	https://www4.unfccc.int/sites/ndcstaging/Pages/Party.aspx?party=KNA&prototype=1	English			22% 35%		BAU	2025 2030	CO2eq		1																1
St Kitts and Nevis	KNA	Non-Annex_I	2021				1		2021-10-25	https://www4.unfccc.int/sites/ndcstaging/Pages/Party.aspx?party=KNA&prototype=1	English			0.61		2010	2030	CO2		1																1
St Lucia	LCA	Non-Annex_I	2016			1			2016-04-22	https://www4.unfccc.int/sites/ndcstaging/Pages/Party.aspx?party=LCA&prototype=1	English			16% 23%	16% 23%	BAU	2025 2030	CO2eq		1	1	1															1					1	1
St Lucia	LCA	Non-Annex_I	2021				1		2021-01-27	https://www4.unfccc.int/sites/ndcstaging/Pages/Party.aspx?party=LCA&prototype=1	English			0.07		2010	2030	CO2eq		1	1	1															1					1	1
St Vincent and the Grenadines	VCT	Non-Annex_I	2016	Second National Communication		1	1		2016-06-29	https://www4.unfccc.int/sites/NDCStaging/pages/Party.aspx?party=VCT	English		0.22		0.22	BAU	2025	CO2eq		1	1	1	1														1	1	1	1	1
Sudan	SDN	Non-Annex_I	2017			1			2017-08-02	https://www4.unfccc.int/sites/ndcstaging/Pages/Party.aspx?party=SDN&prototype=1	English							Mitigatio measures		1	1	1																		1	1		1
Sudan	SDN	Non-Annex_I	2021				1		2021-05-31	https://www4.unfccc.int/sites/ndcstaging/Pages/Party.aspx?party=SDN&prototype=1	English							Mitigation measures
Suriname	SUR	Non-Annex_I	2015	National Climate Change Policy, Strategy and Action Plan (2014-2021)					2019-02-12	https://www4.unfccc.int/sites/ndcstaging/PublishedDocuments/Suriname%20First/Suriname%20First%20NDC.pdf	English		No GHG reduction target	No GHG reduction target	No GHG reduction target	No GHG reduction target	2025	Sectoral actions		1	1	1															1				1
Suriname	SUR	Non-Annex_I	2019	National Climate Change Policy, Strategy and Action Plan (2014-2021)		1	1		2019-12-08	https://www4.unfccc.int/sites/ndcstaging/PublishedDocuments/Suriname%20Second/Suriname%20Second%20NDC.pdf	English		No GHG reduction target	No GHG reduction target	No GHG reduction target	No GHG reduction target	2030	Sectoral actions																1			1		1		1	1
Switzerland	CHE	Annex_I	2017			1			2017-10-05	https://www4.unfccc.int/sites/ndcstaging/Pages/Party.aspx?party=CHE&prototype=1	English		0.5			1990	2030	CO2eq		1	1	1	1		1	1	1										1	1	1	1	1
Switzerland	CHE	Annex_I	2020	Third CO2 act Energy Strategy 2050 7th National Communication Long-term strategy			1		2020-12-08	https://www4.unfccc.int/sites/ndcstaging/Pages/Party.aspx?party=CHE&prototype=1	English		at least 50%			1990	2030	CO2eq		1	1	1	1		1	1	1									1	1	1	1	1	1
Syria	SYR	Non-Annex_I	2018			1	1		2018-11-30	https://www4.unfccc.int/sites/NDCStaging/pages/Party.aspx?party=SYR	Arabic						2030	Mitigation measures																1			1	1	1	1	1
Tajikistan	TJK	Non-Annex_I	2017			1			2017-03-22	https://www4.unfccc.int/sites/ndcstaging/Pages/Party.aspx?party=TJK&prototype=1	Russian		80-90% of 1990 GHG emissions	65-75% of 1990 GHG emissions	65-75% of 1990 GHG emissions	1990	2030	CO2eq per capita		1	1	1															1	1	1		1
Tajikistan	TJK	Non-Annex_I	2021				1		2021-10-12	https://www4.unfccc.int/sites/ndcstaging/Pages/Party.aspx?party=TJK&prototype=1	Russian		60-70% of 1990 GHG emissions	50-60% of 1990 GHG emissions	50-60% of 1990 GHG emissions	1990	2030	CO2eq per capita		1	1	1															1	1	1	1	1
Tanzania	TZA	Non-Annex_I	2018			1			2018-05-18	https://www4.unfccc.int/sites/ndcstaging/Pages/Party.aspx?party=TZA&prototype=1	English				10-20%	BAU	2030	CO2eq																1			1			1	1	1
Tanzania	TZA	Non-Annex_I	2021				1		2021-07-30	https://www4.unfccc.int/sites/ndcstaging/Pages/Party.aspx?party=TZA&prototype=1	English				30-35%	BAU	2030	CO2eq		1	1	1														1
Thailand	THA	Non-Annex_I	2016	Climate Change Master Plan (2015-2050)		1			2016-09-20	https://www4.unfccc.int/sites/ndcstaging/Pages/Party.aspx?party=THA&prototype=1	English		0.2	0.05	0.25	BAU	2030	CO2 eq		1	1	1	1		1	1										1 (Inclusion of land use, land-use change and forestry will be decided later)					X
Thailand	THA	Non-Annex_I	2020	Climate Change Master Plan (2015-2050) NDC roadmap on mitigation (2021-2030)			1		2020-10-25	https://www4.unfccc.int/sites/ndcstaging/Pages/Party.aspx?party=THA&prototype=1	English		0.2	0.05	0.25	BAU	2030	CO2 eq		1	1	1	1		1	1										1					X
Timor-Leste	TLS	Non-Annex_I	2017			1	1		2017-08-16	https://www4.unfccc.int/sites/NDCStaging/pages/Party.aspx?party=TLS	English						2025	Mitigation measures		1	1	1															1		1	1	1
Togo	TGO	Non-Annex_I	2017			1			2017-06-28	https://www4.unfccc.int/sites/ndcstaging/Pages/Party.aspx?party=TGO&prototype=1	French		0.1114	0.2	0.3114	BAU	2030	CO2eq		1	1	1															1		1		1
Togo	TGO	Non-Annex_I	2021				1		2021-10-12	https://www4.unfccc.int/sites/ndcstaging/Pages/Party.aspx?party=TGO&prototype=1	French		0.2051	0.3006	0.5057	BAU	2030	CO2eq		1	1	1	1						1	1		1	1				1	1	1	1	1
Tonga	TON	Non-Annex_I	2016			1			2016-02-20	https://www4.unfccc.int/sites/ndcstaging/Pages/Party.aspx?party=TON&prototype=1	English		Tonga’s contribution is 50% of electricity generation from renewable sources by 2020.					Policies and measures		1	1	1																	1	1		1	1
Tonga	TON	Non-Annex_I	2020	Energy Efficiency Master Plan Tonga Energy Roadmap			1		2020-12-09	https://www4.unfccc.int/sites/ndcstaging/Pages/Party.aspx?party=TON&prototype=1	English		Energy: 13% (16 Gg) reduction in GHG emissions by 2030 compared to 2006 through a transition to 70% renewable electricity as well as energy efficiency measures. x AFOLU: establishment of a forest inventory as prerequisite to identify a GHG emission target for the 2025 NDC and planting one million trees by 2023. x Waste: expansion of the formal waste collection system as prerequisite to identify a…					Sectoral actions		1	1	1							1	1	1	1					1
Trinidad and Tobago	TTO	Non-Annex_I	2018	STRATEGY FOR REDUCTION OF CARBON EMISSIONS IN TRINIDAD AND TOBAGO, 2040.		1	1		2018-02-22	https://www4.unfccc.int/sites/NDCStaging/pages/Party.aspx?party=TTO	English		1.7% Trinidad and Tobago will commit to unconditionally reduce its public transportation emissions by 30% or one million, seven hundred thousand tonnes (1,700,000) CO2e compared to 2013 levels by December 31, 2030 (equivalent to 1.7% of 103 000 000 tonnes CO2eq overall target)	0.133	0.15	BAU	2030	CO2eq		1	1	1																				1	1		1
Tunisia	TUN	Non-Annex_I	2017			1			2017-02-10	https://www4.unfccc.int/sites/ndcstaging/Pages/Party.aspx?party=TUN&prototype=1	French		0.13	0.28	0.41	2010	2030	carbon intensity (t CO2eq/10000DT) GHG emissions/GDP 2005		1	1	1															1	1	1	1	1
Tunisia	TUN	Non-Annex_I	2021				1		2021-10-10	https://www4.unfccc.int/sites/ndcstaging/Pages/Party.aspx?party=TUN&prototype=1	French		0.27	0.18	0.45	2010	2030	carbon intensity (t CO2eq/10000DT) GHG emissions/GDP 2005		1	1	1	1			1											1	1	1	1	1
Turkey	TUR	Annex_I	2021				1		2021-10-11	https://www4.unfccc.int/sites/ndcstaging/Pages/Party.aspx?party=TUR&prototype=1	English				0.21	BAU	2030	CO2eq		1	1	1	1		1	1	1										1	1	1	1	1
Turkmenistan	TKM	Non-Annex_I	2016	NATIONAL CLIMATE CHANGE STRATEGY OF TURMENISTAN		1	1		2016-10-21	https://www4.unfccc.int/sites/NDCStaging/pages/Party.aspx?party=TKM	English						2030	Unclear		1	1	1															1	1	1	1
Tuvalu	TUV	Non-Annex_I	2016			1	1		2016-04-22	https://www4.unfccc.int/sites/NDCStaging/pages/Party.aspx?party=TUV	English		100% electricity generation	60% energy sector		2010	2025	CO2eq		1	1																1		1	1
Uganda	UGA	Non-Annex_I	2016			1	1		2016-09-21	https://www4.unfccc.int/sites/NDCStaging/pages/Party.aspx?party=UGA	English							Policies and measures		1	1	1	1		1	1	1										1				1
Ukraine	UKR	Annex_I	2016			1			2016-09-19	https://www4.unfccc.int/sites/ndcstaging/Pages/Party.aspx?party=UKR&prototype=1	English				0.4	1990	2030	CO2eq		1	1	1	1		1	1	1										1	1	1	1	1
Ukraine	UKR	Annex_I	2021	Policies and Measures Part A Report			1		2021-07-31	https://www4.unfccc.int/sites/ndcstaging/Pages/Party.aspx?party=UKR&prototype=1	English				0.65	1990	2030	CO2eq		1	1	1	1		1	1	1										1	1	1	1	1
United Arab Emirates	ARE	Non-Annex_I	2016			1			2016-09-20	https://www4.unfccc.int/sites/ndcstaging/Pages/Party.aspx?party=ARE&prototype=1	English		24% of energy mix will be clean energy by 2021					Mitigation measures
United Arab Emirates	ARE	Non-Annex_I	2020				1		2020-12-28	https://www4.unfccc.int/sites/ndcstaging/Pages/Party.aspx?party=ARE&prototype=1	Arabic/English		0.235			BAU	2030	CO2eq		1	1	1			1											1	1	1	1	1	1
United Kingdom	GBR	Annex_I	2020	4th BUR UK Government 10 Point Plan for a green industrial revolution UK Clean Growth Strategy Scotland Climate Change Plan A Low Carbon Wales			1		2020-12-11	https://www4.unfccc.int/sites/ndcstaging/Pages/Party.aspx?party=GBR&prototype=1	English		0.68			1990	2030	CO2eq		1	1	1	1		1	1	1									1	1	1	1	1	1
United States of America	USA	Annex_I	2016			1			2016-09-03	https://www4.unfccc.int/sites/ndcstaging/Pages/Party.aspx?party=USA&prototype=1	English		26-28%			2005	2025	CO2eq		1	1	1	1		1	1	1									1
United States of America	USA	Annex_I	2021				1		2021-04-22	https://www4.unfccc.int/sites/ndcstaging/Pages/Party.aspx?party=USA&prototype=1	English		50-52%			2005	2030	CO2eq		1	1	1	1		1	1	1									1
Uruguay	URY	Non-Annex_I	2017			1	1		2017-11-10	https://www4.unfccc.int/sites/NDCStaging/pages/Party.aspx?party=URY	Spanish		24% reduction in CO2 emission intensity per GDP unit 57% reduction in CH4 emissions intensity per GDP unit 48% reduction in N2O emissions intensity per GDP unit 32% reduction in CH4 emissions intensity per product unit (kg of beef cattle measured in live weight) 34% reduction in N2O emissions intensity per product unit (kg of beef cattle measured in live weight)	29% reduction in CO2 emission intensity per GDP unit 59% reduction in CH4 emissions intensity per GDP unit 52% reduction in N2O emissions intensity per GDP unit 37% reduction in CH4 emissions intensity per product unit (kg of beef cattle measured in live weight) 38% reduction in N2O emissions intensity per product unit (kg of beef cattle measured in live weight)		1990	2025	emission intensity individual GHG		1	1	1															1	1	1	1
Uzbekistan	UZB	Non-Annex_I	2018			1			2018-11-09	https://www4.unfccc.int/sites/NDCStaging/pages/Party.aspx?party=UZB	English			0.1		2010	2030	GHG emission per unit GDP		1	1	1															1
Uzbekistan	UZB	Non-Annex_I	2021				1		2021-10-30	https://www4.unfccc.int/sites/NDCStaging/pages/Party.aspx?party=UZB	Russian			0.35		2010	2030	GHG emission per unit GDP		1	1	1	1														1	1	1	1	1
Vanuatu	VUT	Non-Annex_I	2016			1			2021-09-21	https://www4.unfccc.int/sites/ndcstaging/Pages/Party.aspx?party=VUT&prototype=1	English			100% renewable electricity		BAU	2030	Mitigation measures		1																							1
Vanuatu	VUT	Non-Annex_I	2021				1		2021-03-22	https://www4.unfccc.int/sites/ndcstaging/Pages/Party.aspx?party=VUT&prototype=1	English			Sectoral targets		BAU	2030	Mitigation measures		1	1	1															1		1	1	1
Venezuela	VEN	Non-Annex_I	2018			1			2018-02-27	https://www4.unfccc.int/sites/NDCStaging/pages/Party.aspx?party=VEN	Spanish			0.2		BAU	2030	CO2eq																1			1			1	1
Venezuela	VEN	Non-Annex_I	2021				1		2021-11-09	https://www4.unfccc.int/sites/NDCStaging/pages/Party.aspx?party=VEN	Spanish			0.2		BAU	2030	CO2eq																1			1	1	1	1	1
Viet Nam	VNM	Non-Annex_I	2016			1			2016-11-02	https://www4.unfccc.int/sites/ndcstaging/Pages/Party.aspx?party=VNM&prototype=1	English		0.08	0.17	0.25	BAU	2030	2020-2030		1	1	1															1		1	1	1
Viet Nam	VNM	Non-Annex_I	2020	Plan for implementation of the Paris Agreement 2016			1		2020-09-10	https://www4.unfccc.int/sites/ndcstaging/Pages/Party.aspx?party=VNM&prototype=1	English		0.09	0.18	0.27	BAU	2030	CO2eq		1	1	1	1													1	1	1	1	1	1
Zambia	ZMB	Non-Annex_I	2016			1			2016-12-09	https://www4.unfccc.int/sites/ndcstaging/Pages/Party.aspx?party=ZMB&prototype=1	English		0.25	0.22	0.47	BAU	2030	CO2eq		1	1	1															1		1	1	1
Zambia	ZMB	Non-Annex_I	2021				1		2021-07-30	https://www4.unfccc.int/sites/ndcstaging/Pages/Party.aspx?party=ZMB&prototype=1	English			0.47	0.47	BAU	2030	CO2eq		1	1	1	1		1	1											1	1	1	1	1
Zimbabwe	ZWE	Non-Annex_I	2017			1			2017-08-07	https://www4.unfccc.int/sites/ndcstaging/Pages/Party.aspx?party=ZWE&prototype=1	English			0.33	0.33	BAU	2030	CO2eq/capita		1	1	1															1
Zimbabwe	ZWE	Non-Annex_I	2021				1		2021-09-24	https://www4.unfccc.int/sites/ndcstaging/Pages/Party.aspx?party=ZWE&prototype=1	English			0.4	0.4	BAU	2030	CO2eq/capita		1	1	1	1						1	1	1	1	1				1	1	1	1	1
[truncated: 83 more columns]
